# Supplementary material
Source: publisher site journal article supplement (https://www.dovepress.com/article/200801)
Supplement: Supplementary file 1 [file get_supplementary_file.php]

## APPENDIX A. Search strategy

### 1. PubMed

|     |                                                                                                                                                                                                                                                                                                                                                                                                                                                                                                                                                  |        |
|-----|--------------------------------------------------------------------------------------------------------------------------------------------------------------------------------------------------------------------------------------------------------------------------------------------------------------------------------------------------------------------------------------------------------------------------------------------------------------------------------------------------------------------------------------------------|--------|
| #1  | Search (("Patient Education as Topic"[Mesh]) OR ("Education, Patient"[Title/Abstract] OR "Patient Education"[Title/Abstract] OR "Education of Patients"[Title/Abstract]))                                                                                                                                                                                                                                                                                                                                                                        | 90835  |
| #2  | Search ("Medication Alert System*"[Title/Abstract] OR "Alert System*, Medication"[Title/Abstract] OR "System*, Medication Alert"[Title/Abstract] OR ("Reminder Systems"[Mesh]) OR "Reminder System"[Title/Abstract] OR "System*, Reminder"[Title/Abstract])                                                                                                                                                                                                                                                                                      | 3345   |
| #3  | Search (((("Decision Support Systems, Clinical"[Mesh]) OR "Clinical Decision Support*" OR "Decision Support*, Clinical" OR "Support*, Clinical Decision")) OR (((("Technique*, Decision Support"[Title/Abstract] OR "Decision Support Technic*"[Title/Abstract] OR "Decision Analyse*" OR "Decision Modeling"[Title/Abstract] OR "Clinical Prediction Rule*"[Title/Abstract] OR "Prediction Rule*, Clinical"[Title/Abstract] OR "Rule*, Clinical Prediction"[Title/Abstract] OR "Decision Analysis*") OR ("Decision Support Techniques"[Mesh]))) | 137442 |
| #4  | Search (("Decision Aid*"[Title/Abstract] OR "Aid*, Decision"[Title/Abstract] OR "Decision Support Techniques"[Mesh])                                                                                                                                                                                                                                                                                                                                                                                                                             | 73256  |
| #5  | Search (((("Participation, Patient"[Title/Abstract] OR "Patient Involvement"[Title/Abstract] OR "Involvement, Patient"[Title/Abstract] OR "Patient Empowerment"[Title/Abstract] OR "Empowerment, Patient"[Title/Abstract] OR "Patient Participation Rate"[Title/Abstract] OR "Patient Activation"[Title/Abstract] OR "Activation, Patient"[Title/Abstract] OR "Patient Engagement"[Title/Abstract] OR "Engagement, Patient"[Title/Abstract]))) OR "Patient Participation"[MeSH Terms]))                                                          | 27202  |
| #6  | Search ("Self Care"[Title/Abstract] OR "Care, Self"[Title/Abstract] OR "Self-Care"[Title/Abstract] OR "Self-Management" OR "Self Management"[Title/Abstract]) OR (Disease Management[MeSH Terms])                                                                                                                                                                                                                                                                                                                                                | 90081  |
| #7  | Search (("Disease Management"[Title/Abstract] OR "Disease Manage*"[Title/Abstract] OR "Manage*, Disease"[Title/Abstract])                                                                                                                                                                                                                                                                                                                                                                                                                        | 13277  |
| #8  | Search (((kidney transplantation[MeSH Terms]) OR ("Renal Transplant*"[Title/Abstract] OR "Transplant*, Renal"[Title/Abstract] OR "Grafting, Kidney"[Title/Abstract] OR "Kidney Grafting"[Title/Abstract] OR "Transplant*, Kidney"[Title/Abstract] OR "Kidney Transplant*"[Title/Abstract]))                                                                                                                                                                                                                                                      | 97902  |
| #9  | #7 OR #6 OR #5 OR #4 OR #3 OR #2 OR #1                                                                                                                                                                                                                                                                                                                                                                                                                                                                                                           | 339991 |
| #10 | #9 AND #8                                                                                                                                                                                                                                                                                                                                                                                                                                                                                                                                        | 1186   |
| #11 | Filters: English                                                                                                                                                                                                                                                                                                                                                                                                                                                                                                                                 | 1081   |

### 2. Scopus

|                                                                                                                                                                                                                                                                                                                                                                                                                                                                                                                                                                                                                                                                                                                                                                                                                                                                                                                                                                                                                                                                                                                                                                                                                                                                                                                                                                                                                                                                                                                                                                                                                                                                                                                                                                                                                                                                                                                                                                                                                                                                                                                                                                                                                                                                                                                                                                                                                                                                     |      |
|---------------------------------------------------------------------------------------------------------------------------------------------------------------------------------------------------------------------------------------------------------------------------------------------------------------------------------------------------------------------------------------------------------------------------------------------------------------------------------------------------------------------------------------------------------------------------------------------------------------------------------------------------------------------------------------------------------------------------------------------------------------------------------------------------------------------------------------------------------------------------------------------------------------------------------------------------------------------------------------------------------------------------------------------------------------------------------------------------------------------------------------------------------------------------------------------------------------------------------------------------------------------------------------------------------------------------------------------------------------------------------------------------------------------------------------------------------------------------------------------------------------------------------------------------------------------------------------------------------------------------------------------------------------------------------------------------------------------------------------------------------------------------------------------------------------------------------------------------------------------------------------------------------------------------------------------------------------------------------------------------------------------------------------------------------------------------------------------------------------------------------------------------------------------------------------------------------------------------------------------------------------------------------------------------------------------------------------------------------------------------------------------------------------------------------------------------------------------|------|
| ( (TITLE-ABS-KEY ( ("Medication Alert System" OR "Medication Alert" ) ) OR TITLE-ABS-KEY ( "Reminder Systems" OR "Reminder" ) OR TITLE-ABS-KEY ( "Decision Support Systems, Clinical" OR "Clinical Decision Support" OR "Support, Clinical Decision" ) OR TITLE-ABS-KEY ( "Decision Support Techniques" OR "Technique, Decision Support" OR "Decision Support Technic" OR "Decision Analysis" OR "Decision Modeling" OR "Clinical Prediction Rule" OR "Prediction Rule, Clinical" OR "Rule, Clinical Prediction" OR "Decision Analysis" ) OR TITLE-ABS-KEY ( "Telemedicine" OR "Mobile Health" OR "mHealth" OR "Telehealth" ) OR TITLE-ABS-KEY ( "self care" OR "self management" OR "self-administrated" ) OR TITLE-ABS-KEY ( "Disease Management" OR "Management Disease" ) OR TITLE-ABS-KEY ( "Aid Decision" OR "Decision Aid" ) OR TITLE-ABS-KEY ( "Patient Participation" OR "Patient Involvement" OR "Involvement Patient" OR "Patient Empowerment" OR "Empowerment Patient" OR "Patient Participation" OR "Patient Activation" OR "Activation Patient" OR "Patient Engagement" ) OR TITLE-ABS-KEY ( "Patient Education as Topic" OR "Education, Patient" OR "Patient Education" OR "Education of Patients" ) AND TITLE-ABS-KEY ( "Kidney Transplantation" OR "Renal Transplantation" OR "Transplantations Renal" OR "Kidney Grafting" ) ) AND ORIG-LOAD-DATE AFT 20180922 AND ( EXCLUDE ( SUBJAREA, "CENG" ) OR EXCLUDE ( SUBJAREA, "AGRI" ) OR EXCLUDE ( SUBJAREA, "ARTS" ) OR EXCLUDE ( SUBJAREA, "VETE" ) OR EXCLUDE ( SUBJAREA, "CHEM" ) OR EXCLUDE ( SUBJAREA, "EART" ) OR EXCLUDE ( SUBJAREA, "ECON" ) OR EXCLUDE ( SUBJAREA, "PHYS" ) ) AND ( EXCLUDE ( DOCTYPE, "cp" ) OR EXCLUDE ( DOCTYPE, "ed" ) OR EXCLUDE ( DOCTYPE, "no" ) OR EXCLUDE ( DOCTYPE, "le" ) OR EXCLUDE ( DOCTYPE, "ch" ) ) AND ( EXCLUDE ( LANGUAGE, "French" ) OR EXCLUDE ( LANGUAGE, "German" ) OR EXCLUDE ( LANGUAGE, "Spanish" ) OR EXCLUDE ( LANGUAGE, "Chinese" ) OR EXCLUDE ( LANGUAGE, "Italian" ) OR EXCLUDE ( LANGUAGE, "Japanese" ) OR EXCLUDE ( LANGUAGE, "Portuguese" ) OR EXCLUDE ( LANGUAGE, "Dutch" ) OR EXCLUDE ( LANGUAGE, "Croatian" ) OR EXCLUDE ( LANGUAGE, "Polish" ) OR EXCLUDE ( LANGUAGE, "Turkish" ) OR EXCLUDE ( LANGUAGE, "Czech" ) OR EXCLUDE ( LANGUAGE, "Danish" ) OR EXCLUDE ( LANGUAGE, "Korean" ) OR EXCLUDE ( LANGUAGE, "Norwegian" ) OR EXCLUDE ( LANGUAGE, "Serbian" ) OR EXCLUDE ( LANGUAGE, "Slovak" ) OR EXCLUDE ( LANGUAGE, "Swedish" ) ) | 1161 |
|---------------------------------------------------------------------------------------------------------------------------------------------------------------------------------------------------------------------------------------------------------------------------------------------------------------------------------------------------------------------------------------------------------------------------------------------------------------------------------------------------------------------------------------------------------------------------------------------------------------------------------------------------------------------------------------------------------------------------------------------------------------------------------------------------------------------------------------------------------------------------------------------------------------------------------------------------------------------------------------------------------------------------------------------------------------------------------------------------------------------------------------------------------------------------------------------------------------------------------------------------------------------------------------------------------------------------------------------------------------------------------------------------------------------------------------------------------------------------------------------------------------------------------------------------------------------------------------------------------------------------------------------------------------------------------------------------------------------------------------------------------------------------------------------------------------------------------------------------------------------------------------------------------------------------------------------------------------------------------------------------------------------------------------------------------------------------------------------------------------------------------------------------------------------------------------------------------------------------------------------------------------------------------------------------------------------------------------------------------------------------------------------------------------------------------------------------------------------|------|

## APPENDIX B.

**Supplementary Table 1. Risk of bias of individual RCT studies.**

**Cochrane Collaboration's evaluation tool was used to assess the quality of clinical trials**

|                                     | Christina Freier <i>et al.</i> , 2010 | Kullgren KA <i>et al.</i> , 2015 | Bethany J. Foster <i>et al.</i> , 2018 |
|-------------------------------------|---------------------------------------|----------------------------------|----------------------------------------|
| Random Sequence Generation          | Unclear risk                          | Unclear risk                     | Low risk                               |
| Allocation Concealment              | Unclear risk                          | Unclear risk                     | Low risk                               |
| Blinding Participants And Personnel | Unclear risk                          | High risk                        | High risk                              |
| Blinding Outcome Assessor           | Unclear risk                          | Unclear risk                     | Low risk                               |
| Incomplete Outcomes Data            | Low risk                              | Unclear risk                     | Low risk                               |
| Selective Outcomes Reporting        | Low risk                              | Low risk                         | Low risk                               |
| Other Bias                          | Unclear risk                          | Unclear risk                     | Unclear risk                           |

**Supplementary Table 2. Risk of bias of quasi-experimental studies.**

**Quality Assessment Tool for Pre and Post Intervention Designs (Brown et al 2014)**

| Criterion                                                                                                            | Malone et al. , 2016    | David K. Hooper et al. , 2012 |
|----------------------------------------------------------------------------------------------------------------------|-------------------------|-------------------------------|
| <b>1. Sampling (2 points)</b>                                                                                        |                         |                               |
| a. Was probability sampling used? (1 point)                                                                          | No                      | No                            |
| b. Was sample size justified to obtain power? (1 point)                                                              | No                      | No                            |
| <b>2. Design (2 points)</b>                                                                                          |                         |                               |
| a. One pre-test or baseline and several post-test measures (2 points) <b>OR</b>                                      | -                       | Yes                           |
| b. Simple before-and-after study (1 point)                                                                           | Yes                     | -                             |
| <b>3. Control of confounders (2 points)</b>                                                                          |                         |                               |
| Does the study employ a comparison strategy? An attempt to create or assess equivalence of groups at baseline by:    |                         |                               |
| a. Matching group participants (2 points) <b>OR</b>                                                                  | No                      | No                            |
| b. Statistical control (1 point) <b>OR</b>                                                                           | -                       | -                             |
| c. None (0 point)                                                                                                    | -                       | -                             |
| <b>4. Data collection and Outcome measurement (5 points)</b>                                                         |                         |                               |
| a. Was the dependent variable directly measured by an assessor? (1 point)                                            | Yes                     | Yes                           |
| b. Were dependent variables either:<br>i. Directly measured (2 points) <b>OR</b><br>ii. Self-reported (1 point)      | Yes (Directly measured) | Yes (Directly measured)       |
| c. Were dependent variables measured reliably (with reliability indices previously or for this study)? (1 point)     | N/A                     | N/A                           |
| d. Were dependent variables measured validly (with validity assessments previously or for this study)? (1 point)     | N/A                     | N/A                           |
| <b>5. Statistical analysis and Conclusions (4 points)</b>                                                            |                         |                               |
| a. Was (were) the statistical test(s) used appropriate for the main outcome and at least 80% of the others (1 point) | Yes                     | Yes                           |
| b. Were p values and confidence intervals reported properly? (1 point)                                               | No                      | Yes                           |
| c. If multiple outcomes were studied, were correlations analyzed? (1 point)                                          | N/A                     | Yes                           |
| d. Were missing data managed appropriately? (1 point)                                                                | N/A                     | N/A                           |
| <b>6. Drop outs (1 point)</b>                                                                                        |                         |                               |
| a. Is attrition rate <30% (if no attrition code1) (1 point)                                                          | Yes                     | Yes                           |
| <b>Total Score</b>                                                                                                   | <b>0.5</b>              | <b>0.69</b>                   |
| <b>Rank</b>                                                                                                          | <b>Weak</b>             | <b>Moderate</b>               |

Note: Total score calculation (total number of points obtained ÷ 16 – N/A). N/A = not applicable. Highest possible number of points that can be obtained is 16. Articles and papers with a score of 0.80 or higher were rated strong, a score between 0.61-0.79 as moderate, and a score of 0.60 or less as weak. \*Included as it was the only paper that reported outcomes at the systems level.
